# Supplementary material
Source: HighWire-hosted journal article supplement (https://www.g3journal.org/content/suppl/2015/05/20/g3.115.019083)
Supplement: FigureS3.pdf [file FigureS3.pdf]

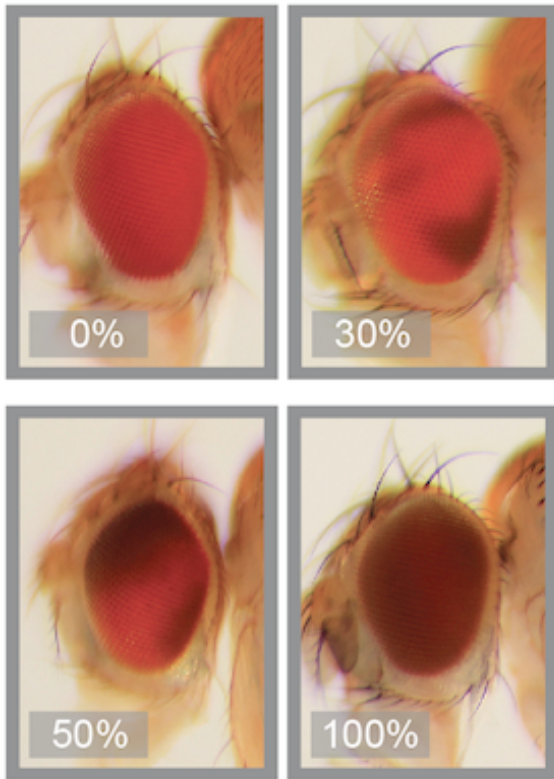

**Figure S3.** Assessing activity of gRNAs targeting *se*. Eyes from flies heterozygous for *act-cas9* and *gRNA-se* transgenes were examined by three independent researchers. Example images are shown of eyes with various degree of *se* mutant tissue, which has darker coloration than wild type tissue. Mean values from the independent observations are shown in Figure 3 (see also Table S2).
