# Supplementary material
Source: HighWire-hosted journal article supplement (https://www.g3journal.org/content/suppl/2015/05/20/g3.115.019083)
Supplement: FigureS3.pdf [file FigureS3.pdf]

 

Loading...
